# Supplementary material for: First Molecular Detection of Pathogens Leptospira in Common Rodent Captured in North Algeria Urban Areas
Source: MDPI journal article supplement (doi:10.3390/tropicalmed7110335), 2022-10-29
Supplement: s1 [file s1]

**Table S1.** Detailed information of all positive samples for *Leptospira* species identification.

|        | Rodent's species <sup>a</sup> | Sexe   | Age       | Site <sup>b</sup> | Kedney<br><i>Leptospira</i> species<br>identification | Lung<br><i>Leptospira</i> species<br>identification | Urine<br><i>Leptospira</i> species<br>identification |
|--------|-------------------------------|--------|-----------|-------------------|-------------------------------------------------------|-----------------------------------------------------|------------------------------------------------------|
| Rat 1  | RN                            | Male   | Adult     | 1 urban           | <i>L. interrogans</i> *                               | -                                                   | -                                                    |
| Rat 7  | RN                            | Male   | Adult     | 1 urban           | <i>L. interrogans</i>                                 | <i>L. interrogans</i>                               | unknown                                              |
| Rat 8  | RN                            | Female | Adult     | 1 urban           | <i>L. interrogans</i>                                 | -                                                   | -                                                    |
| Rat 9  | RN                            | Male   | Adult     | 1 urban           | <i>L. interrogans</i>                                 | -                                                   | -                                                    |
| Rat 10 | RN                            | Male   | Young     | 1 urban           | <i>L. interrogans</i> *                               | -                                                   | -                                                    |
| Rat 14 | RN                            | Female | Adult     | 1 urban           | <i>L. interrogans</i>                                 | -                                                   | -                                                    |
| Rat16  | RN                            | Female | Adult     | 9 periurban       | <i>L. interrogans</i>                                 | -                                                   | <i>L. interrogans</i>                                |
| Rat 19 | RN                            | Female | Adult     | 9 periurban       | -                                                     | -                                                   | <i>L. interrogans</i>                                |
| Rat 20 | RN                            | Male   | Adult     | 9 periurban       | <i>L. interrogans</i>                                 | -                                                   | -                                                    |
| Rat 25 | RN                            | Female | Adult     | 9 periurban       | <i>L. interrogans</i>                                 | -                                                   | -                                                    |
| Rat26  | RN                            | Male   | Adult     | 9 periurban       | <i>L. interrogans</i>                                 | -                                                   | -                                                    |
| Rat29  | RN                            | Male   | Adult     | 1 urban           | -                                                     | -                                                   | <i>L. interrogans</i> *                              |
| Rat 30 | RN                            | Female | Adult     | 1 urban           | <i>L. interrogans</i>                                 | -                                                   | -                                                    |
| Rat 34 | RN                            | Female | Adult     | 1 urban           | <i>L. interrogans</i>                                 | -                                                   | -                                                    |
| Rat 41 | RN                            | Female | Adult     | 9 periurban       | <i>L. interrogans</i>                                 | -                                                   | -                                                    |
| Rat 46 | RR                            | Male   | Adult     | 9 periurban       | <i>L. interrogans</i> *                               | -                                                   | -                                                    |
| Rat 48 | RN                            | Male   | Adult     | 9 periurban       | <i>L.borgpetersenii</i> *                             | -                                                   | -                                                    |
| Rat 51 | RN                            | Female | Adult     | 9 periurban       | <i>L. interrogans</i>                                 | -                                                   | -                                                    |
| Rat 52 | RN                            | Male   | Adult     | 9 periurban       | <i>L. interrogans</i> *                               | -                                                   | -                                                    |
| Rat 55 | RN                            | Male   | Adult     | 2 urban           | <i>L. interrogans</i>                                 | -                                                   | <i>L. interrogans</i>                                |
| Rat 57 | RN                            | Female | Adult     | 7 rural           | <i>L. interrogans</i>                                 | -                                                   | -                                                    |
| Rat 58 | RN                            | Male   | Adult     | 7 rural           | <i>L. interrogans</i>                                 | -                                                   | <i>L. interrogans</i>                                |
| Rat 59 | RN                            | Male   | Adult     | 7 rural           | <i>L. interrogans</i>                                 | -                                                   | <i>L. interrogans</i>                                |
| Rat 62 | RN                            | Male   | Adult     | 2 urban           | unknown                                               | -                                                   | -                                                    |
| Rat 66 | RN                            | Female | Adult     | 6 urban           | <i>L. interrogans</i>                                 | -                                                   | -                                                    |
| Rat 70 | RN                            | Female | Adult     | 2 urban           | <i>L. interrogans</i>                                 | -                                                   | <i>L. interrogans</i>                                |
| Rat 73 | RN                            | Male   | Adult     | 1 urban           | <i>L. interrogans</i>                                 | -                                                   | -                                                    |
| Rat 74 | RN                            | Female | Adult     | 6 urban           | <i>L. interrogans</i>                                 | -                                                   | -                                                    |
| Rat 75 | RN                            | Male   | Adult     | 6 urban           | <i>L. interrogans</i>                                 | <i>L. interrogans</i> *                             | -                                                    |
| Rat 76 | RN                            | Male   | Adult     | 2 urban           | <i>L. interrogans</i>                                 | -                                                   | -                                                    |
| Rat 77 | RN                            | Male   | Adult     | 2 urban           | -                                                     | <i>L. interrogans</i> *                             | -                                                    |
| Rat 80 | RN                            | Female | Sub-adult | 1 urban           | <i>L. interrogans</i>                                 | -                                                   | -                                                    |
| Rat 81 | RN                            | Male   | Adult     | 4 urban           | <i>L. interrogans</i>                                 | -                                                   | -                                                    |
| Rat 84 | RN                            | Male   | Adult     | 4 urban           | -                                                     | -                                                   | <i>L. interrogans</i>                                |
| Rat 85 | RN                            | Male   | Adult     | 4 urban           | <i>L. interrogans</i>                                 | -                                                   | <i>L. interrogans</i>                                |
| Rat 91 | RN                            | Male   | Adult     | 4 urban           | <i>L. interrogans</i>                                 | -                                                   | <i>L. interrogans</i>                                |
| Rat 92 | RN                            | Female | Adult     | 4 urban           | <i>L. interrogans</i>                                 | -                                                   | <i>L. interrogans</i>                                |
| Rat 93 | RN                            | Male   | Adult     | 3 urban           | <i>L. interrogans</i>                                 | -                                                   | -                                                    |
| Rat 95 | RN                            | Female | Adult     | 3 urban           | <i>L. interrogans</i>                                 | -                                                   | -                                                    |
| Rat 96 | RN                            | Female | Adult     | 3 urban           | <i>L. interrogans</i>                                 | -                                                   | -                                                    |
| Rat 97 | RN                            | Male   | Adult     | 3 urban           | -                                                     | -                                                   | <i>L. interrogans</i>                                |

<sup>a</sup> RN : *Rattus Norvegicus*, RR : *Rattus Rattus*

<sup>b</sup> Site1: 36°27'45"N2°50'15"E, Site 2: 36°29'57"N2°50'43"E, Site 3: 36°28'02.6"N2°49'16.3"E, Site 4: 36°28'52.8"N2°51'04.5"E, Site 5: 36°31'39.4"N2°53'26.4"E, Site 6: 36°29'12"N2°48'21"E, Site 7 : 36°30'28"N2°53'48"E, Site 8: 36°29'51"N2°45'29"E, Site 9 : 36°27'24"N2°48'47"E.  
(\*)*Leptospira* species identified by sequencing after conventional PCR confirmation.
