# Supplementary figures and images for: First Molecular Detection of Pathogens Leptospira in Common Rodent Captured in North Algeria Urban Areas
Source: MDPI journal article supplement (doi:10.3390/tropicalmed7110335), 2022-10-29

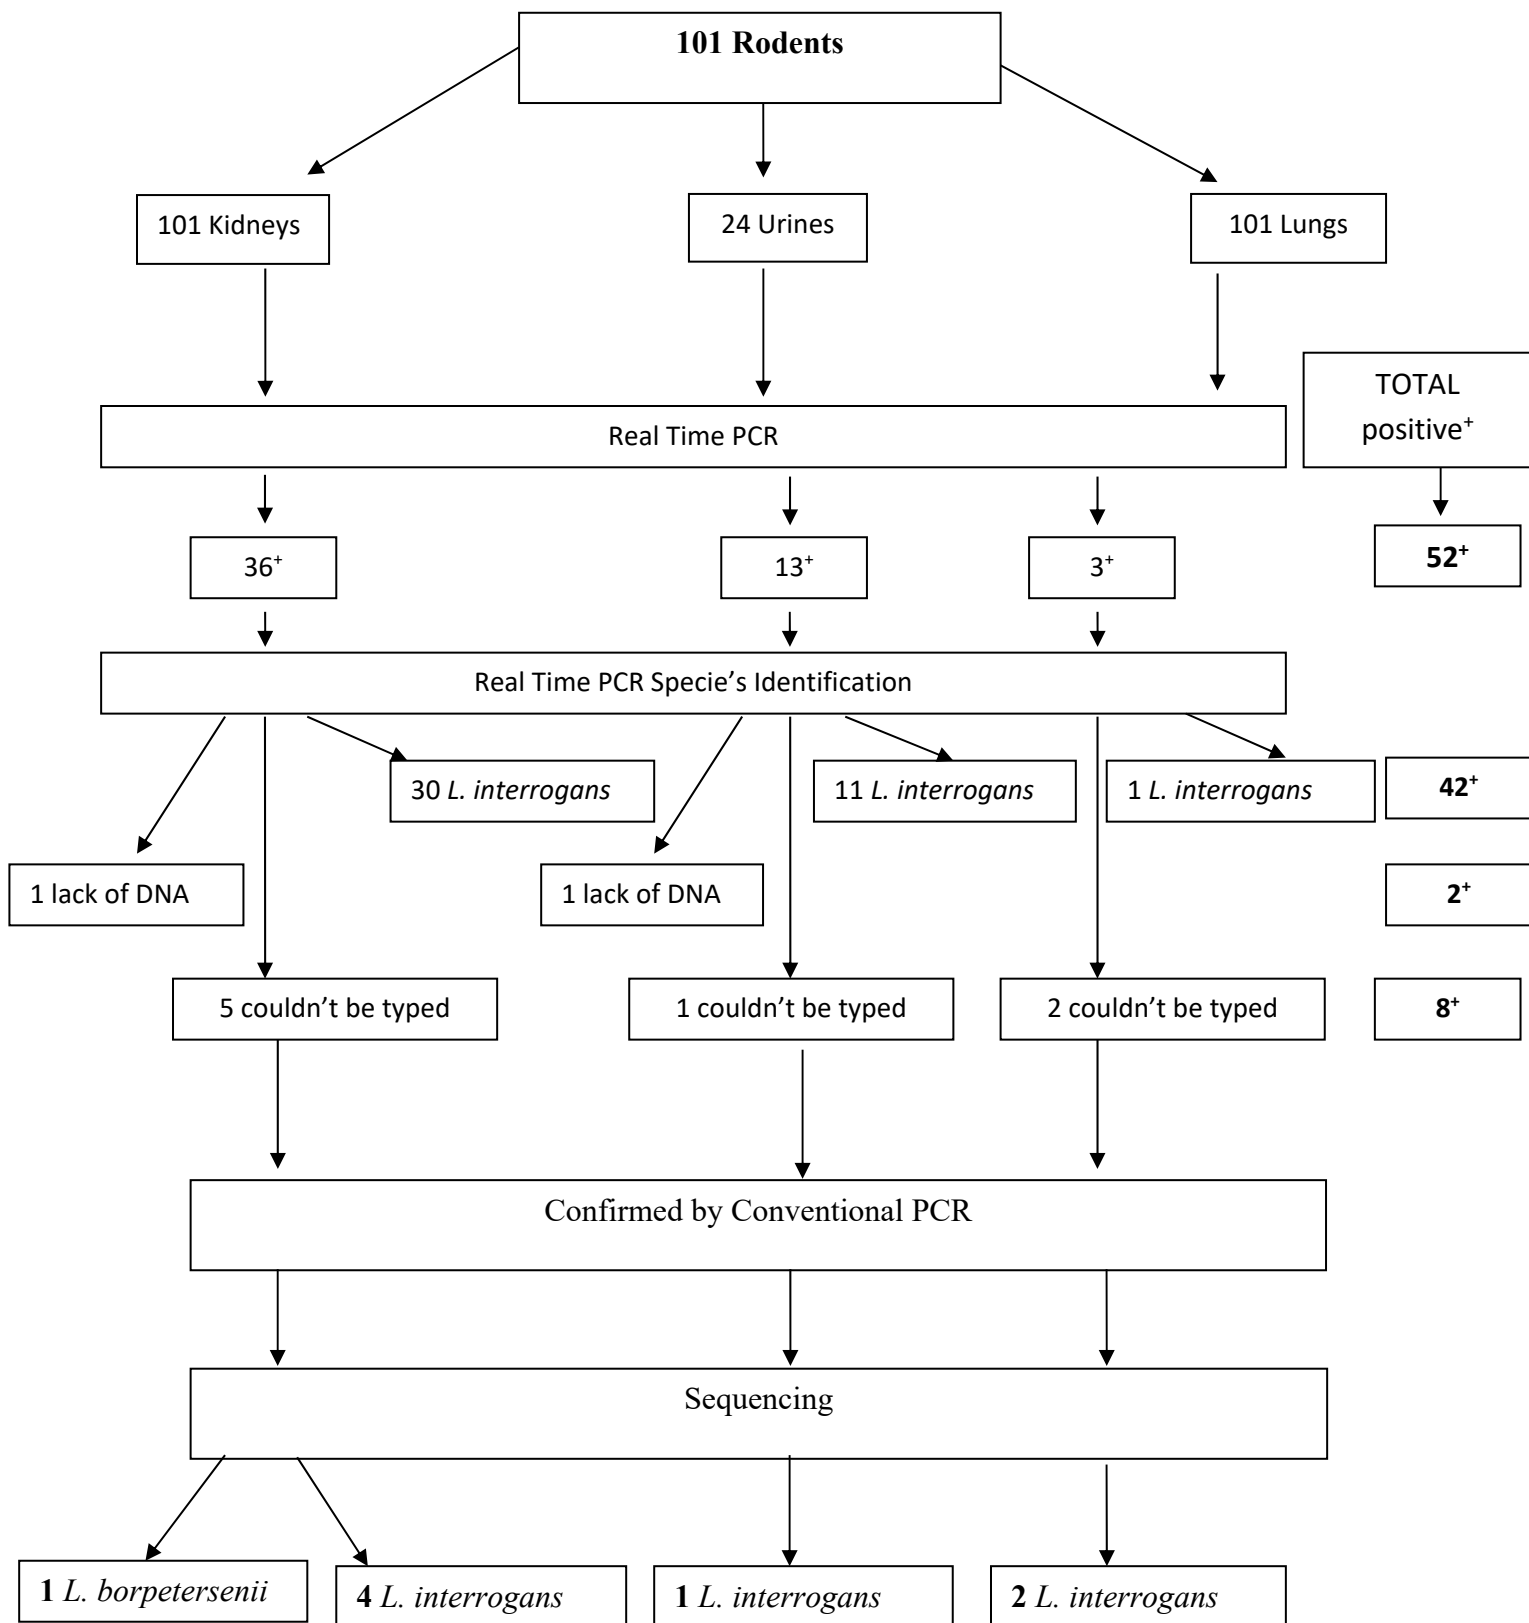

Figure S1. Flow diagram summarizing all PCRs reactions.

Supplement: s1 [file s1]
